# Supplementary material
Source: PubMed Central journal article supplement (PMC4365908)
Supplement: ar500374r_si_001.pdf [file ar500374r_si_001.pdf]

# ProPhenol-Catalyzed Asymmetric Additions by Spontaneously Assembled Dinuclear Main Group Metal Complexes

Barry M. Trost,\* and Mark J. Bartlett<sup>†</sup>

Department of Chemistry, Stanford University, CA 94305-5080.

## Supporting Information

Reference 8. Trost, B. M.; Rohbogner, C. *Unpublished results*.

Recovery of the ProPhenol ligand **1a**. Briefly, a Zn-ProPhenol-catalyzed reaction was quenched with *sat. aq.* NaHSO<sub>4</sub> and the ProPhenol bis sodium salt isolated by filtration. The resulting solid was neutralized with 1 M NaOH, stirred with EtOAc for 12 hours and extracted twice with EtOAc. The combined organic layers were washed with brine, dried over MgSO<sub>4</sub>, filtered and concentrated *in vacuo* to approximately 100 mL total volume. Hexanes (150–200 mL) was then added to cause precipitation and the resulting solid isolated by filtration. The ProPhenol ligand was isolated as a yellow solid (2.7 g, 95% recovery). Alternatively, the ProPhenol ligand can be purified by silica gel chromatography (gradient elution: 9:1 to 4:1 pet. ether: EtOAc).
